# Supplementary material
Source: Springer Nature journal article supplement (https://www.springermedizin.de/resource/supplementary/12889_2013_6311_MOESM4_ESM.pdf/9497622)

# NLES items reported

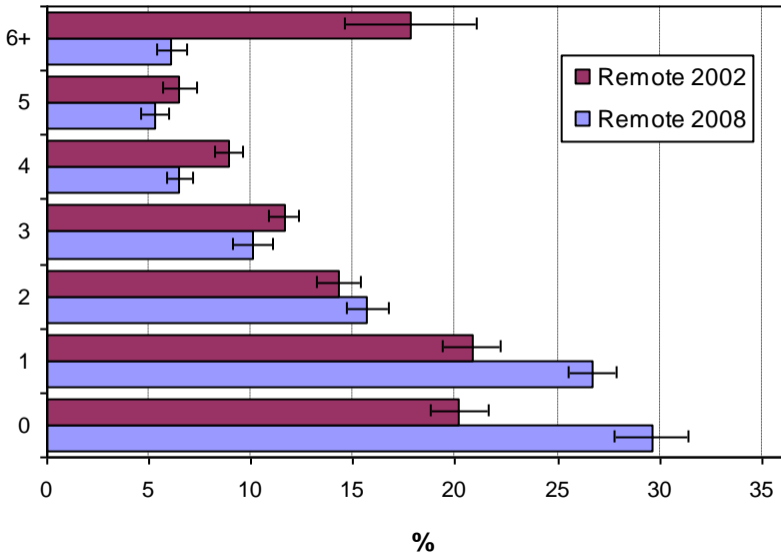

Supplement: MOESM4 [file 9497622]
